# Supplementary material for: Intra- and interspecific competition resulting from spatial coexistence among larvae of closely-related caddisflies from the genus Hydropsyche
Source: PeerJ. 2022 Jun 23;10:e13576. doi: 10.7717/peerj.13576 (PMC9233898; doi:10.7717/peerj.13576)
Supplement: Supplemental Information 1 — All parameters tested: combat results, head capsule width, body weight, mandibles dimensions. [file peerj-10-13576-s001.xlsx]

## Sheet: results of encounters
	Explanations:		H. cont. - Hydropsyche contubernalis			HCW - head capsule width		ML - mandible length
			H. mod. - Hydropsyche modesta			BW - body weight		MW - mandible width
			H. pellu. - Hydropsyche pellucidula			[mg w.m.] - mg wet mass		DBM - distance between mandibles
			x - confirmation of a victory or a draw
	species 1	species 2	victory species 1	victory species 2	draw	HCW [mm] species 1	BW [mg w.m.] species 1	HCW [mm] species 2	BW [mg w.m.] species 2	ML [µm] species 1	MW [µm] species 1	DBM [µm] species 1	ML [µm] species 2	MW [µm] species 2	DBM [µm] species 2
1	H. cont.	H.cont.			x	1.33659	30.11	1.21951	25.75	612.5	312.5	325	600	275	362.5
2	H. cont.	H.cont.			x	1.32439	37.37	1.19512	26.72	600	287.5	337.5	600	262.5	375
3	H.cont.	H.cont.			x	1.31707	13.34	1.21951	10.63	600	287.5	337.5	587.5	275	362.5
4	H.cont.	H.cont.	x			1.32927	17.01	1.20732	8.66	637.5	275	362.5	525	275	412.5
5	H.cont.	H.cont.	x			1.37805	13.56	1.09756	11.52	637.5	287.5	325	512.5	275	375
6	H.cont.	H.cont.		x		1.26829	15.67	1.36585	14.77	600	275	337.5	637.5	287.5	325
7	H.cont.	H.cont.	x			1.35366	14.58	1.26829	13.5	625	312.5	337.5	575	262.5	350
8	H.cont.	H.cont.	x			1.31707	12.52	1.26829	11.55	612.5	312.5	325	512.5	275	375
9	H.cont.	H.cont.	x			1.31707	9.3	1.2439	9.9	600	287.5	337.5	512.5	275	375
10	H.cont.	H.cont.			x	1.36585	14.64	1.31707	8.86	600	275	337.5	525	275	412.5
11	H.cont.	H.cont.			x	1.31707	13.34	1.21951	10.63	472.5	300	412.5	562.5	275	312.5
12	H.cont.	H.cont.	x			1.32927	17.01	1.20732	8.66	637.5	287.5	325	575	287.5	350
13	H.cont.	H.cont.	x			1.37805	13.56	1.09756	11.52	637.5	275	362.5	562.5	275	312.5
14	H.cont.	H.cont.		x		1.26829	15.67	1.36585	14.77	575	262.5	325	600	275	350
15	H.cont.	H.cont.	x			1.35366	14.58	1.26829	13.5	600	275	350	525	275	412.5
16	H.cont.	H.cont.	x			1.31707	12.52	1.26829	11.55	637.5	287.5	325	600	275	337.5
17	H.cont.	H.cont.	x			1.31707	9.3	1.2439	9.9	625	312.5	337.5	575	262.5	350
18	H.cont.	H.cont.			x	1.36585	14.64	1.31707	8.86	512.5	275	375	612.5	312.5	325
19	H.cont.	H.cont.	x			1.4878	24.32	1.31707	28.66	600	287.5	337.5	512.5	275	375
20	H.cont.	H.cont.		x		1.16098	64.13	1.21951	20.2	575	287.5	350	637.5	287.5	325
21	H.cont.	H.cont.		x		1.30976	36.9	1.31707	28.48	562.5	275	312.5	637.5	275	362.5
22	H.cont.	H.cont.		x		1.19756	44.8	1.26829	31.92	575	262.5	325	600	275	350
23	H.cont.	H.cont.	x			1.30976	43.77	1.26829	28.26	600	275	350	525	275	412.5
24	H.cont.	H.cont.	x			1.58537	32.39	1.37805	24	562.5	300	362.5	525	275	412.5
25	H.cont.	H.cont.			x	1.31707	13.34	1.21951	10.63	472.5	300	412.5	562.5	275	312.5
26	H.cont.	H.cont.	x			1.32927	17.01	1.20732	8.66	472.5	337.5	425	575	262.5	362.5
27	H.cont.	H.cont.	x			1.37805	13.56	1.09756	11.52	472.5	300	412.5	562.5	275	312.5
28	H.cont.	H.cont.		x		1.26829	15.67	1.36585	14.77	575	262.5	325	600	275	350
29	H.cont.	H.cont.	x			1.35366	14.58	1.26829	13.5	625	312.5	337.5	575	262.5	350
30	H.cont.	H.cont.	x			1.31707	12.52	1.26829	11.55	637.5	287.5	325	575	287.5	350
31	H.cont.	H.cont.	x			1.31707	9.3	1.2439	9.9	637.5	275	362.5	562.5	275	312.5
32	H.cont.	H.cont.			x	1.36585	14.64	1.31707	8.86	600	287.5	337.5	600	262.5	375
33	H.mod.	H.cont.			x	1.35366	29.75	1.37805	24.91	510	350	462.5	587.5	287.5	375
34	H.mod.	H.cont.			x	1.56098	31.16	1.19512	27.73	503.75	312.5	425	587.5	287.5	375
35	H.mod.	H.cont.	x			1.46341	46.75	1.26829	25.47	562.5	300	362.5	525	275	412.5
36	H.mod.	H.cont.		x		1.29268	29.79	1.26829	21.82	447.5	312.5	387.5	575	287.5	350
37	H.mod.	H.cont.	x			1.31707	32.67	1.21951	16.76	550	325	375	525	275	412.5
38	H.mod.	H.cont.			x	1.41463	18.86	1.29268	23.56	460	287.5	387.5	525	275	412.5
39	H.mod.	H.cont.	x			1.56098	27.95	1.28049	20.49	503.75	312.5	425	562.5	250	325
40	H.mod.	H.cont.			x	1.34146	13.55	1.26829	18.1	472.5	300	412.5	525	275	412.5
41	H.mod.	H.cont.			x	1.46341	15.39	1.26829	21.45	460	325	400	562.5	250	375
42	H.mod.	H.cont.			x	1.31707	13.88	1.2439	14.41	447.5	312.5	387.5	525	275	412.5
43	H.mod.	H.cont.			x	1.32927	14.56	1.2439	20.13	472.5	300	412.5	587.5	287.5	375
44	H.mod.	H.cont.			x	1.41463	16.38	1.20732	14.46	472.5	312.5	387.5	525	275	412.5
45	H.mod.	H.cont.			x	1.26829	14.06	1.2439	14.74	472.5	325	425	525	275	412.5
46	H.mod.	H.cont.			x	1.2439	14.22	1.2439	16.43	472.5	300	412.5	562.5	275	312.5
47	H.mod.	H.cont.		x		1.2439	18.25	1.2439	21.57	460	287.5	387.5	575	300	337.5
48	H.mod.	H.cont.			x	1.35366	29.75	1.37805	24.91	472.5	337.5	425	575	250	375
49	H.mod.	H.cont.			x	1.56098	31.16	1.19512	27.73	550	325	375	525	275	412.5
50	H.mod.	H.cont.	x			1.46341	46.75	1.26829	25.47	497.5	287.5	443.75	562.5	250	375
51	H.mod.	H.cont.		x		1.29268	29.79	1.26829	21.82	460	287.5	387.5	575	262.5	362.5
52	H.mod.	H.cont.	x			1.31707	32.67	1.21951	16.76	485	312.5	450	575	250	375
53	H.mod.	H.cont.			x	1.41463	18.86	1.29268	23.56	485	312.5	450	575	250	375
54	H.mod.	H.cont.	x			1.56098	27.95	1.28049	20.49	472.5	337.5	425	575	250	375
55	H.mod.	H.cont.			x	1.34146	13.55	1.26829	18.1	497.5	275	362.5	575	300	337.5
56	H.mod.	H.cont.			x	1.46341	15.39	1.26829	21.45	472.5	300	412.5	525	275	412.5
57	H.mod.	H.cont.			x	1.31707	13.88	1.2439	14.41	472.5	312.5	412.5	575	287.5	350
58	H.mod.	H.cont.			x	1.32927	14.56	1.2439	20.13	472.5	325	425	575	262.5	325
59	H.mod.	H.cont.		x		1.2439	18.25	1.2439	21.57	447.5	312.5	387.5	562.5	312.5	387.5
60	H.mod.	H.cont.			x	1.54878	78.27	1.26829	20.05	562.5	300	362.5	525	275	412.5
61	H.mod.	H.cont.			x	1.5122	39.8	1.26829	24.77	503.75	312.5	425	587.5	287.5	375
62	H.mod.	H.cont.			x	1.52439	37.37	1.19512	26.72	472.5	337.5	425	525	275	412.5
63	H.mod.	H.mod.			x	1.41463	16.38	1.20732	14.46	485	312.5	450	575	275	300
64	H.mod.	H.mod.			x	1.26829	14.06	1.2439	14.74	472.5	325	425	525	275	412.5
65	H.mod.	H.mod.			x	1.2439	14.22	1.2439	16.43	472.5	300	412.5	525	275	412.5
66	H.mod.	H.mod.		x		1.46341	29.89	1.39024	24	497.5	287.5	443.75	612.5	312.5	325
67	H.mod.	H.mod.	x			1.56098	64.56	1.17073	30.05	503.75	312.5	425	587.5	287.5	375
68	H.mod.	H.mod.	x			1.63415	54.88	1.26829	20.05	550	325	375	525	275	412.5
69	H.mod.	H.mod.		x		1.53659	30.11	1.21951	25.75	503.75	312.5	425	587.5	287.5	375
70	H.mod.	H.mod.			x	1.35366	29.75	1.37805	24.91	497.5	287.5	443.75	587.5	275	362.5
71	H.mod.	H.mod.		x		1.56098	31.16	1.19512	27.73	562.5	300	362.5	587.5	275	362.5
72	H.mod.	H.mod.	x			1.46341	46.75	1.26829	25.47	472.5	337.5	425	575	262.5	362.5
73	H.mod.	H.mod.		x		1.29268	29.79	1.26829	21.82	460	287.5	387.5	575	300	337.5
74	H.mod.	H.mod.	x			1.31707	32.67	1.21951	16.76	472.5	300	412.5	562.5	275	312.5
75	H.mod.	H.mod.		x		1.39024	26.26	1.56098	60.17	485	312.5	450	503.75	312.5	425
76	H.mod.	H.mod.		x		1.4878	18.31	1.57317	27.47	587.5	287.5	375	550	312.5	362.5
77	H.mod.	H.mod.		x		1.69512	32.7	1.56098	31.72	550	325	375	510	350	462.5
78	H.mod.	H.mod.	x			1.2439	13.91	1.4878	17.66	460	287.5	387.5	587.5	287.5	375
79	H.mod.	H.mod.	x			1.30488	17.43	1.53659	30.28	472.5	325	425	587.5	287.5	375
80	H.mod.	H.mod.	x			1.56098	27.95	1.28049	20.49	472.5	312.5	387.5	575	275	300
81	H.mod.	H.mod.	x			1.34146	13.55	1.26829	18.1	485	312.5	450	575	275	300
82	H.mod.	H.mod.		x		1.46341	15.39	1.26829	21.45	497.5	287.5	443.75	575	275	300
83	H.mod.	H.mod.	x			1.31707	13.88	1.2439	14.41	485	312.5	450	575	275	300
84	H.mod.	H.mod.		x		1.32927	14.56	1.2439	20.13	472.5	325	425	525	275	412.5
85	H.mod.	H.mod.	x			1.41463	16.38	1.20732	14.46	472.5	312.5	387.5	525	275	412.5
86	H.mod.	H.mod.	x			1.26829	14.06	1.2439	14.74	472.5	325	425	525	275	412.5
87	H.mod.	H.mod.	x			1.2439	14.22	1.2439	16.43	472.5	300	412.5	525	275	412.5
88	H.mod.	H.mod.		x		1.2439	18.25	1.2439	21.57	472.5	325	437.5	525	275	412.5
89	H.mod.	H.mod.	x			1.54878	78.27	1.26829	20.05	472.5	312.5	387.5	575	275	300
90	H.mod.	H.mod.		x		1.43902	31.36	1.26829	24.77	497.5	287.5	443.75	575	275	300
91	H.mod.	H.mod.	x			1.4878	24.32	1.31707	28.66	587.5	287.5	375	575	275	300
92	H.mod.	H.mod.	x			1.65854	35.75	1.26829	28.57	550	325	375	525	275	412.5
93	H.mod.	H.mod.		x		1.60976	36.9	1.31707	28.48	587.5	287.5	375	472.5	325	425
94	H.mod.	H.mod.	x			1.53659	30.11	1.39024	24	562.5	300	362.5	460	287.5	387.5
95	H.mod.	H.pellu.		x		1.64634	73.71	1.60976	59.95	522.5	325	450	562.5	325	425
96	H.mod.	H.pellu.		x		1.41463	30.16	1.54878	37.38	522.5	325	450	600	312.5	425
97	H.mod.	H.pellu.		x		1.37805	35.39	1.54878	78.27	522.5	325	450	587.5	312.5	375
98	H.mod.	H.pellu.	x			1.5122	31.67	1.52439	45.75	510	350	462.5	562.5	350	425
99	H.mod.	H.pellu.		x		1.39024	26.26	1.56098	60.17	510	350	462.5	550	312.5	362.5
100	H.mod.	H.pellu.			x	1.46341	25.08	1.58537	37.3	472.5	337.5	425	587.5	312.5	375
101	H.mod.	H.pellu.			x	1.4878	18.31	1.57317	27.47	485	312.5	450	575	312.5	437.5
102	H.mod.	H.pellu.		x		1.63415	34	1.57317	32.65	522.5	325	450	575	312.5	437.5
103	H.mod.	H.pellu.			x	1.41463	23.84	1.60976	31.86	447.5	312.5	387.5	587.5	337.5	425
104	H.mod.	H.pellu.			x	1.69512	32.7	1.56098	31.72	522.5	325	450	587.5	312.5	375
105	H.mod.	H.pellu.			x	1.2439	13.91	1.4878	17.66	472.5	312.5	412.5	550	325	387.5
106	H.mod.	H.pellu.			x	1.30488	17.43	1.53659	30.28	485	312.5	450	550	325	387.5
107	H.mod.	H.pellu.		x		1.64634	73.71	1.60976	59.95	522.5	325	450	587.5	312.5	375
108	H.mod.	H.pellu.		x		1.41463	30.16	1.54878	37.38	472.5	312.5	387.5	562.5	325	362.5
109	H.mod.	H.pellu.		x		1.37805	35.39	1.54878	78.27	460	287.5	387.5	562.5	300	362.5
110	H.mod.	H.pellu.	x			1.5122	31.67	1.52439	45.75	522.5	325	450	562.5	337.5	400
111	H.mod.	H.pellu.		x		1.39024	26.26	1.56098	60.17	503.75	312.5	425	550	312.5	387.5
112	H.mod.	H.pellu.			x	1.46341	25.08	1.58537	37.3	472.5	337.5	425	587.5	312.5	375
113	H.mod.	H.pellu.			x	1.4878	18.31	1.57317	27.47	497.5	275	362.5	575	325	425
114	H.mod.	H.pellu.		x		1.63415	34	1.57317	32.65	522.5	325	450	575	312.5	437.5
115	H.mod.	H.pellu.			x	1.41463	23.84	1.60976	31.86	472.5	312.5	387.5	562.5	300	362.5
116	H.mod.	H.pellu.			x	1.69512	32.7	1.56098	31.72	522.5	325	450	587.5	312.5	375
117	H.mod.	H.pellu.			x	1.2439	13.91	1.4878	17.66	472.5	312.5	387.5	562.5	300	362.5
118	H.mod.	H.pellu.			x	1.30488	17.43	1.53659	30.28	497.5	287.5	443.75	562.5	350	425
119	H.mod.	H.pellu.		x		1.64634	73.71	1.60976	59.95	522.5	325	450	575	312.5	437.5
120	H.mod.	H.pellu.		x		1.41463	30.16	1.54878	37.38	472.5	312.5	387.5	562.5	300	362.5
121	H.mod.	H.pellu.		x		1.37805	35.39	1.54878	78.27	460	287.5	387.5	562.5	325	425
122	H.mod.	H.pellu.	x			1.5122	31.67	1.52439	45.75	522.5	325	450	562.5	337.5	400
123	H.mod.	H.pellu.			x	1.46341	25.08	1.58537	37.3	472.5	312.5	412.5	562.5	300	362.5
124	H.mod.	H.pellu.			x	1.63415	34	1.57317	32.65	522.5	325	450	575	325	425
125	H.mod.	H.pellu.			x	1.41463	23.84	1.60976	31.86	460	287.5	387.5	587.5	337.5	425
126	H.pellu.	H.cont.	x			1.58537	44.27	1.31707	22.24	587.5	337.5	425	587.5	287.5	375
127	H.pellu.	H.cont.		x		1.46341	29.89	1.39024	24	537.5	312.5	387.5	650	287.5	325
128	H.pellu.	H.cont.			x	1.56098	64.56	1.17073	30.05	562.5	325	400	587.5	275	362.5
129	H.pellu.	H.cont.		x		1.43902	31.36	1.26829	27.2	537.5	312.5	387.5	562.5	312.5	387.5
130	H.pellu.	H.cont.			x	1.5122	39.8	1.26829	24.77	550	312.5	400	587.5	287.5	375
131	H.pellu.	H.cont.			x	1.63415	54.88	1.26829	20.05	600	312.5	425	600	275	350
132	H.pellu.	H.cont.			x	1.58537	32.69	1.29268	23.91	562.5	325	425	587.5	287.5	375
133	H.pellu.	H.cont.			x	1.53659	30.11	1.21951	25.75	562.5	325	425	575	300	337.5
134	H.pellu.	H.cont.			x	1.52439	37.37	1.19512	26.72	562.5	325	400	575	287.5	350
135	H.pellu.	H.cont.	x			1.56098	64.47	1.39024	32.7	562.5	325	400	575	262.5	350
136	H.pellu.	H.cont.	x			1.54878	78.27	1.26829	20.05	562.5	300	362.5	562.5	275	312.5
137	H.pellu.	H.cont.			x	1.53659	30.11	1.39024	24	562.5	300	362.5	600	287.5	337.5
138	H.pellu.	H.cont.			x	1.52439	37.37	1.21951	16.76	562.5	350	425	575	250	375
139	H.pellu.	H.cont.			x	1.43902	31.36	1.26829	24.77	550	325	387.5	575	287.5	350
140	H.pellu.	H.cont.	x			1.4878	24.32	1.31707	28.66	562.5	325	400	575	262.5	350
141	H.pellu.	H.cont.		x		1.56098	64.13	1.21951	20.2	562.5	337.5	400	587.5	287.5	375
142	H.pellu.	H.cont.			x	1.60976	36.9	1.31707	28.48	587.5	337.5	425	625	312.5	337.5
143	H.pellu.	H.cont.		x		1.59756	44.8	1.26829	31.92	562.5	337.5	400	575	250	375
144	H.pellu.	H.cont.	x			1.65854	35.75	1.26829	28.57	600	337.5	437.5	600	275	362.5
145	H.pellu.	H.cont.		x		1.5	45.67	1.29268	23.11	550	312.5	400	587.5	275	362.5
146	H.pellu.	H.cont.			x	1.63415	29.48	1.26829	24.22	600	337.5	437.5	600	275	337.5
147	H.pellu.	H.cont.	x			1.56098	42.94	1.26829	16.12	562.5	350	425	575	250	375
148	H.pellu.	H.cont.			x	1.60976	43.77	1.26829	28.26	600	312.5	425	575	287.5	350
149	H.pellu.	H.cont.			x	1.58537	32.39	1.37805	24	562.5	337.5	400	600	262.5	375
150	H.pellu.	H.cont.	x			1.58537	44.27	1.31707	22.24	587.5	337.5	425	587.5	287.5	375
151	H.pellu.	H.cont.		x		1.46341	29.89	1.39024	24	537.5	312.5	387.5	637.5	287.5	325
152	H.pellu.	H.cont.			x	1.56098	64.56	1.17073	30.05	562.5	325	362.5	587.5	275	362.5
153	H.pellu.	H.cont.		x		1.43902	31.36	1.26829	27.2	550	312.5	400	562.5	250	375
154	H.pellu.	H.cont.			x	1.5122	39.8	1.26829	24.77	562.5	325	362.5	587.5	287.5	375
155	H.pellu.	H.cont.			x	1.63415	54.88	1.26829	20.05	600	312.5	425	600	250	300
156	H.pellu.	H.cont.			x	1.58537	32.69	1.29268	23.91	562.5	325	362.5	575	287.5	350
157	H.pellu.	H.cont.	x			1.56098	64.47	1.39024	32.7	550	325	387.5	625	312.5	337.5
158	H.pellu.	H.pellu.	x			1.56098	34.35	1.65854	28	562.5	325	362.5	600	337.5	437.5
159	H.pellu.	H.pellu.		x		1.56098	39.56	1.58537	28.68	550	325	400	587.5	337.5	425
160	H.pellu.	H.pellu.			x	1.43902	25.78	1.5122	28.47	550	312.5	400	562.5	337.5	400
161	H.pellu.	H.pellu.	x			1.65854	27.43	1.58537	25.21	650	325	412.5	575	312.5	437.5
162	H.pellu.	H.pellu.		x		1.46341	23.45	1.57317	26.06	537.5	312.5	387.5	550	325	387.5
163	H.pellu.	H.pellu.		x		1.36585	10.95	1.68293	16.44	537.5	312.5	387.5	650	325	412.5
164	H.pellu.	H.pellu.			x	1.65854	21.52	1.56098	25.36	600	337.5	437.5	562.5	325	425
165	H.pellu.	H.pellu.	x			1.53659	24.1	1.47561	19.48	550	325	387.5	550	312.5	400
166	H.pellu.	H.pellu.	x			1.63415	16.45	1.53659	12.4	587.5	312.5	375	550	325	400
167	H.pellu.	H.pellu.	x			1.56098	34.35	1.65854	28	562.5	350	425	587.5	312.5	375
168	H.pellu.	H.pellu.		x		1.56098	39.56	1.58537	28.68	550	325	400	587.5	337.5	425
169	H.pellu.	H.pellu.			x	1.43902	25.78	1.5122	28.47	562.5	325	362.5	562.5	300	362.5
170	H.pellu.	H.pellu.	x			1.65854	27.43	1.58537	25.21	650	325	412.5	575	312.5	437.5
171	H.pellu.	H.pellu.		x		1.46341	23.45	1.57317	26.06	537.5	312.5	387.5	550	312.5	400
172	H.pellu.	H.pellu.		x		1.36585	10.95	1.68293	16.44	525	275	387.5	650	325	412.5
173	H.pellu.	H.pellu.			x	1.65854	21.52	1.56098	25.36	550	325	400	587.5	312.5	375
174	H.pellu.	H.pellu.	x			1.53659	24.1	1.47561	19.48	550	312.5	387.5	550	312.5	400
175	H.pellu.	H.pellu.	x			1.63415	16.45	1.53659	12.4	587.5	312.5	375	550	325	400
176	H.pellu.	H.pellu.			x	1.53659	30.11	1.39024	24	562.5	300	362.5	575	300	337.5
177	H.pellu.	H.pellu.			x	1.52439	37.37	1.21951	16.76	562.5	300	362.5	575	300	337.5
178	H.pellu.	H.pellu.		x		1.43902	31.36	1.26829	24.77	562.5	300	362.5	525	275	412.5
179	H.pellu.	H.pellu.	x			1.65854	35.75	1.26829	28.57	650	325	412.5	525	275	387.5
180	H.pellu.	H.pellu.	x			1.5	45.67	1.29268	23.11	562.5	300	362.5	525	275	412.5
181	H.pellu.	H.pellu.	x			1.56098	42.94	1.26829	16.12	562.5	300	362.5	575	300	337.5
182	H.pellu.	H.pellu.	x			1.58537	44.27	1.31707	22.24	575	312.5	437.5	550	312.5	362.5
183	H.pellu.	H.pellu.		x		1.43902	31.36	1.26829	27.2	562.5	300	362.5	525	275	412.5
184	H.pellu.	H.pellu.	x			1.56098	64.47	1.39024	32.7	575	325	425	550	325	375
185	H.pellu.	H.pellu.	x			1.56098	34.35	1.65854	28	562.5	350	425	587.5	312.5	375
186	H.pellu.	H.pellu.		x		1.56098	39.56	1.58537	28.68	550	325	400	587.5	337.5	425
187	H.pellu.	H.pellu.			x	1.43902	25.78	1.5122	28.47	562.5	325	362.5	562.5	300	362.5
188	H.pellu.	H.pellu.	x			1.65854	27.43	1.58537	25.21	600	312.5	425	587.5	337.5	425
189	H.pellu.	H.pellu.		x		1.46341	23.45	1.57317	26.06	537.5	312.5	387.5	550	312.5	400
190	H.pellu.	H.pellu.		x		1.36585	10.95	1.68293	16.44	537.5	312.5	425	600	337.5	437.5
191	H.pellu.	H.pellu.			x	1.65854	21.52	1.56098	25.36	600	337.5	437.5	562.5	325	362.5
192	H.pellu.	H.pellu.	x			1.53659	24.1	1.47561	19.48	550	312.5	400	537.5	312.5	387.5
193	H.pellu.	H.pellu.	x			1.63415	16.45	1.53659	12.4	587.5	312.5	375	562.5	325	362.5
